# Supplementary material for: A Novel Mutation in the Upstream Open Reading Frame of the CDKN1B Gene Causes a MEN4 Phenotype
Source: PubMed Central journal article supplement (PMC3605397; doi:10.1371/journal.pgen.1003350), 2013-03-21

A

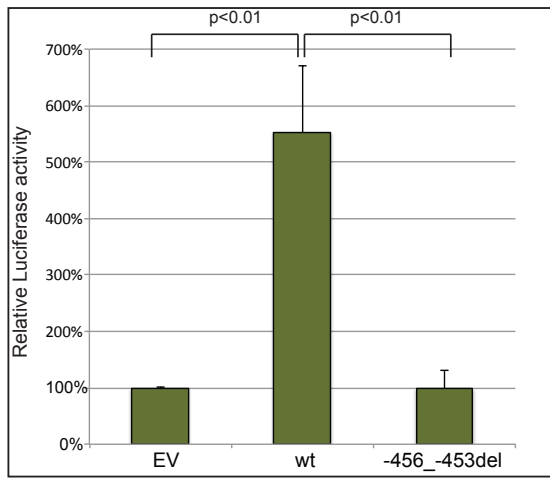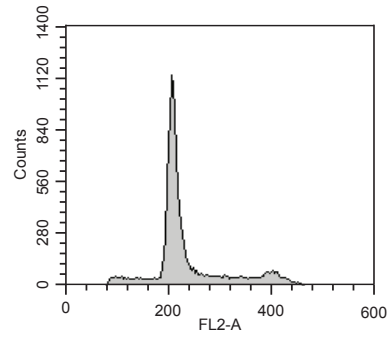

B

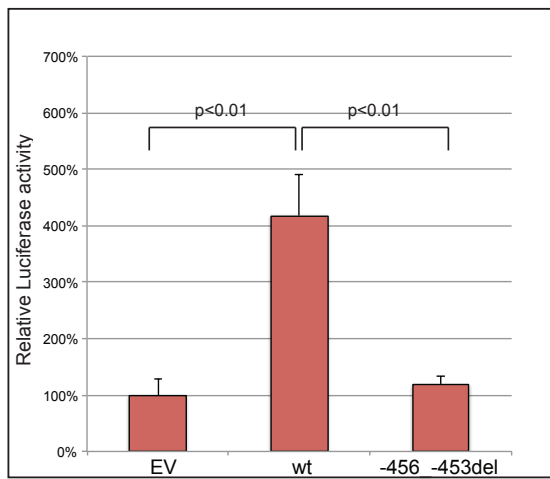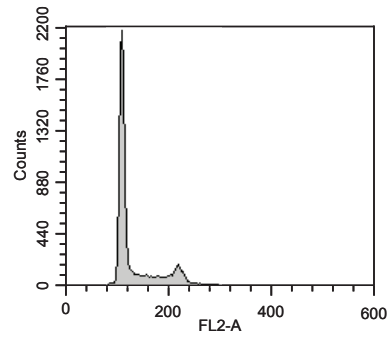

Supplement: pgen.1003350.s001.pdf [file pgen.1003350.s001.pdf]
